# Supplementary material
Source: Research Square preprint supplement (doi:10.21203/rs.3.rs-9844925/v1)
Supplement: Supplementary file 1 [file 04659a187efa1702649d0b0e.docx]

**Influenza Literacy Scale for Nursing Home Caregivers**

**Dear Respondent:**

Thank you very much for your participation. This survey aims to understand your knowledge, attitudes, and practices regarding influenza prevention and control. To ensure the validity and reliability of the findings, please complete the questionnaire independently without consulting others or searching online. This questionnaire is anonymous. There are no right or wrong answers. Please answer honestly based on your actual situation. Thank you for your support and cooperation.

**Part 1: Demographic Information**

| Item | Response Options |
| --- | --- |
| 1. Location of your facility | _______ City/Prefecture _______ County/District |
| 2. Do you hold a nursing caregiver certificate? | □ Yes □ No |
| 3. Gender | □ Male □ Female |
| 4. Age | □ ≤30 years □ 31-40 years □ 41-50 years □ ≥51 years |
| 5. Education level | □ Primary school or below □ Junior high school  □ High school/Vocational □ College or above |
| 6. Academic major | □ Geriatric Nursing □ Rehabilitation Therapy  □ Geriatric Service and Management □ Other |
| 7. Work experience | □ <1 year □ 1-5 years □ 6-10 years □ >10 years |
| 8. Received influenza training in past two years | □ Yes □ No |
| 9. Experience in responding to influenza cluster outbreaks | □ Yes (_______ times) □ No |
| 10. Employment type | □ Full-time □ Part-time |

**Part 2: Influenza Knowledge**

**1. The main pathogen causing influenza is:**

- □ A. Bacteria
- □ B. Virus
- □ C. Fungus
- □ D. Don't know

**2. The main transmission routes of influenza are (multiple selections):**

- □ A. Airborne droplets (e.g., coughing, sneezing)
- □ B. Direct contact (e.g., handshaking)
- □ C. Contact with virus-contaminated surfaces
- □ D. Mosquito bites

**3. Which of the following are typical symptoms of influenza? (multiple selections)**

- □ A. Sudden high fever
- □ B. Cough and sore throat
- □ C. Headache and muscle pain
- □ D. Nasal congestion and runny nose
- □ E. Vomiting, abdominal pain, diarrhea

**4. The high-incidence season for influenza is:**

- □ A. Winter and spring
- □ B. Summer and autumn
- □ C. Spring and summer
- □ D. Don't know

**5. The duration of viral shedding in influenza patients is typically:**

- □ A. 1 day
- □ B. 2-3 days
- □ C. 3-7 days
- □ D. Don't know

**6. Which of the following behaviors can effectively reduce influenza transmission? (multiple selections)**

- □ A. Wearing a mask
- □ B. Frequent hand hygiene
- □ C. Maintaining social distance
- □ D. Receiving influenza vaccination

**7. Who are the susceptible populations to influenza virus? (multiple selections)**

- □ A. Older adults
- □ B. Children
- □ C. Pregnant women
- □ D. Patients with chronic diseases
- □ E. Don't know

**8. The most common complications of influenza include (multiple selections):**

- □ A. Pneumonia
- □ B. Neurological damage
- □ C. Myositis and rhabdomyolysis
- □ D. Systemic inflammatory response

**9. Which of the following disinfectants can kill influenza pathogens? (multiple selections)**

- □ A. Alcohol (ethanol)
- □ B. Iodophor
- □ C. Chlorine-containing disinfectants
- □ D. Ultraviolet light

**10. Which of the following statements about influenza is correct?**

- □ A. Influenza is just a severe cold; taking common cold medicine is sufficient.
- □ B. Influenza viruses are classified into types A, B, C, and D, with type A being prone to causing large-scale pandemics.
- □ C. After getting influenza once, the body develops lifelong immunity and will not get it again.
- □ D. Influenza only circulates in winter.

**11. The best time for influenza vaccination is:**

- □ A. Before the influenza season
- □ B. When having influenza
- □ C. During the influenza season
- □ D. Don't know

**12. What is the main reason the influenza vaccine needs to be administered annually?**

- □ A. The protective effect of the vaccine lasts only about one year.
- □ B. Influenza viruses mutate rapidly, and the vaccine composition is updated annually to match circulating strains.
- □ C. The previous year's vaccine becomes ineffective.
- □ D. All of the above are correct.

**13. Which of the following populations are recommended as priority groups for influenza vaccination?**

- □ A. Children aged 6 months to 5 years, adults aged 60 years and older
- □ B. Pregnant women and women planning pregnancy
- □ C. Patients with chronic diseases (e.g., heart disease, diabetes, asthma) and healthcare workers
- □ D. All of the above

**14. Which of the following is a correct understanding of influenza vaccine effectiveness?**

- □ A. Vaccination guarantees 100% protection against influenza.
- □ B. Even if infected with influenza after vaccination, it can significantly reduce the risk of severe illness, hospitalization, and death.
- □ C. The vaccine also prevents the common cold.
- □ D. Healthy young people do not need vaccination.

**15. Which of the following conditions are contraindications or require temporary deferral of influenza vaccination? (multiple selections)**

- □ A. History of severe allergy to any vaccine component (e.g., excipients, formaldehyde)
- □ B. Current high fever or acute illness
- □ C. Uncontrolled epilepsy or other severe neurological disorders
- □ D. Mild cough and nasal congestion

**Part 3: Attitudes Toward Influenza and Influenza Vaccine**

**Instructions:** Please select the option that best reflects your actual situation.

**Scale:** 1 = Strongly Disagree, 2 = Disagree, 3 = Neutral, 4 = Agree, 5 = Strongly Agree

| No. | Item | 1 | 2 | 3 | 4 | 5 |
| --- | --- | --- | --- | --- | --- | --- |
| 1 | Influenza is not a common cold; it is a serious respiratory disease. | □ | □ | □ | □ | □ |
| 2 | Influenza poses a significant threat to the health of older adults and can even lead to death. | □ | □ | □ | □ | □ |
| 3 | Influenza can be prevented and treated, so I am not worried about contracting it. | □ | □ | □ | □ | □ |
| 4 | It is necessary for nursing staff to adopt daily preventive behaviors (e.g., mask-wearing, hand hygiene). | □ | □ | □ | □ | □ |
| 5 | When older adults consult me about influenza-related issues, I will patiently answer their questions. | □ | □ | □ | □ | □ |
| 6 | Older adults are at higher risk of contracting influenza and are a priority population for prevention. | □ | □ | □ | □ | □ |
| 7 | When elderly residents have influenza-like symptoms, I am willing to wear a mask while caring for them and provide special attention. | □ | □ | □ | □ | □ |
| 8 | I am willing to use my free time to actively learn about influenza prevention and control. | □ | □ | □ | □ | □ |
| 9 | When experiencing influenza-like symptoms, one should not use medication indiscriminately but should use antivirals rationally. | □ | □ | □ | □ | □ |
| 10 | Long-term care facilities should regularly organize influenza prevention and control training. | □ | □ | □ | □ | □ |
| 11 | The influenza vaccine is the most effective measure for preventing influenza. | □ | □ | □ | □ | □ |
| 12 | Influenza vaccination for nursing staff and elderly residents is very important. | □ | □ | □ | □ | □ |
| 13 | The influenza vaccine should be received annually. | □ | □ | □ | □ | □ |
| 14 | Nursing staff and elderly residents should be supported in receiving free vaccination. | □ | □ | □ | □ | □ |
| 15 | The influenza vaccine has a high safety profile. | □ | □ | □ | □ | □ |

**Part 4: Influenza Prevention and Vaccination Practices**

**Instructions:** Please select the option that best reflects your actual situation.

**Scale:** 1 = Never, 2 = Rarely, 3 = Sometimes, 4 = Often, 5 = Always

| No. | Item | 1 | 2 | 3 | 4 | 5 |
| --- | --- | --- | --- | --- | --- | --- |
| 1 | Proactively wear masks during daily care. | □ | □ | □ | □ | □ |
| 2 | Change masks regularly during work. | □ | □ | □ | □ | □ |
| 3 | Perform daily room ventilation during work. | □ | □ | □ | □ | □ |
| 4 | Maintain social distance when caring for elderly residents with influenza-like symptoms. | □ | □ | □ | □ | □ |
| 5 | Perform hand disinfection or wear gloves before and after each care interaction. | □ | □ | □ | □ | □ |
| 6 | Regularly clean and disinfect work areas. | □ | □ | □ | □ | □ |
| 7 | If an elderly resident develops a fever, I will continue to care for them, provide physical cooling, and recommend medical attention if severe. | □ | □ | □ | □ | □ |
| 8 | Recommend and guide prophylactic medication for elderly residents at risk of influenza. | □ | □ | □ | □ | □ |
| 9 | When influenza is suspected, I will seek medical care, receive treatment, rest at home, and avoid working while ill. | □ | □ | □ | □ | □ |
| 10 | Proactively report influenza cluster outbreaks to the local CDC. | □ | □ | □ | □ | □ |
| 11 | Actively seek or inquire about influenza vaccination information released by healthcare institutions or CDCs. | □ | □ | □ | □ | □ |
| 12 | Get vaccinated annually before the influenza season (e.g., after temperature drops in winter, around the Spring Festival). | □ | □ | □ | □ | □ |
| 13 | If I develop symptoms such as cough or fever but influenza is not confirmed, I will still get the influenza vaccine. | □ | □ | □ | □ | □ |
| 14 | I find the procedure for getting an influenza vaccination convenient (e.g., appointment, registration). | □ | □ | □ | □ | □ |
| 15 | I am willing to recommend influenza vaccination to the elderly residents I care for. | □ | □ | □ | □ | □ |

**Part 5: Other Information**

**1. Have you received the influenza vaccine this year?**

- □ A. Yes
- □ B. No

**2. Does your facility recommend that you receive the influenza vaccine?**

- □ A. Yes
- □ B. No

**3. Has your facility organized free influenza vaccination services?**

- □ A. Yes (□ for elderly residents □ for nursing staff)
- □ B. No

**4. Is there an influenza vaccination site near your workplace or home?**

- □ A. Yes
- □ B. No
- □ C. I haven't paid attention

**5. Have the local community health center, CDC, or your facility reminded you to get the influenza vaccine via text message, notification, etc.?**

- □ A. Yes
- □ B. No

**6. Reasons for not wanting to receive the influenza vaccine (multiple selections):**

- □ A. Concern about side effects
- □ B. Cost considerations
- □ C. Do not think it is necessary
- □ D. Physical reasons/contraindications
- □ E. Other

**7. Which of the following measures would increase your willingness to receive the influenza vaccine? (multiple selections)**

- □ A. Including the influenza vaccine in medical insurance coverage
- □ B. Government strengthening public awareness campaigns for the influenza vaccine
- □ C. Government implementing policies to provide free vaccination for older adults and staff in nursing homes
- □ D. Vaccinators coming to nursing homes to provide centralized vaccination
- □ E. Granting half-day leave to voluntarily vaccinated staff to visit vaccination sites

**8. Your daily internet use time:**

- □ A. <1 hour
- □ B. 1-2 hours
- □ C. 2-3 hours
- □ D. >3 hours

**9. Your sources of influenza and other infectious disease prevention information (multiple selections):**

- □ A. Bulletin boards or posters
- □ B. Training lectures
- □ C. Online information
- □ D. Social networks
- □ E. Text messages
- □ F. Other

**10. What content do you hope to receive in training?**

- □ A. Theoretical knowledge of influenza prevention and control
- □ B. Practical skills for influenza prevention and control
- □ C. Both A and B
