# Supplementary material
Source: Research Square preprint supplement (doi:10.21203/rs.3.rs-9844925/v1)
Supplement: Supplementary file 2 [file 955f2604f419a07515a461f2.docx]

**Influenza Prevention and Control Scale for Nursing Homes**

**Dear Respondent,**

Thank you for taking the time to answer this questionnaire. This survey aims to understand the current status of influenza prevention and control in your facility. The results will be used for data analysis only, and all facility information will be kept strictly confidential. Please complete the questionnaire based on your facility's actual situation. Thank you for your support and cooperation.

**Section 1: Basic Information**

| Item | Response |
| --- | --- |
| Facility name |  |
| Facility location |  |
| Facility type | □ Public □ Private |
| Total staff on duty | _______ persons, of which caregivers: _______ persons |
| Staff education level | Bachelor degree or above: _______ persons; Associate degree: _______ persons; Technical secondary school: _______ persons; High school or below: _______ persons |
| Staff age | Under 25: _______ persons; 25-34: _______ persons; 35-44: _______ persons; 45-54: _______ persons; 55 and above: _______ persons |
| Has the facility experienced an influenza cluster outbreak in the past three years? | □ Yes □ No |
| Number of influenza vaccinations this year | _______ persons, of which elderly residents: _______ persons, caregivers: _______ persons |

**Section 2: Policy Support**

| No. | Item | Yes | No |
| --- | --- | --- | --- |
| 1 | Does the facility maintain health records for influenza and other infectious diseases? | □ | □ |
| 2 | Does the facility have a system for reporting influenza outbreak detection and registration? | □ | □ |
| 3 | Does the facility have an emergency response plan for influenza outbreaks? | □ | □ |
| 4 | Does the facility maintain disinfection records? | □ | □ |
| 5 | Is the facility a designated monitoring site for the national disinfection monitoring program? | □ | □ |
| 6 | Does the facility have influenza vaccine-related policies, such as free on-site centralized vaccination? | □ | □ |
| 7 | Does the facility maintain records of staff absenteeism due to illness? | □ | □ |

**Section 3: Funding**

| Item | Response |
| --- | --- |
| Does the facility have dedicated funding for influenza prevention and control? | □ Yes (_____ CNY) □ No |

**Section 4: Resource Allocation**

| Item | Response |
| --- | --- |
| Does the facility have stockpiles of infectious disease prevention supplies (e.g., hand sanitizer, masks)? | □ Yes □ No |

**Section 5: Personnel Management**

| No. | Item | Yes | No |
| --- | --- | --- | --- |
| 1 | Are facility leaders clear about the division of responsibilities, work processes, and protocols for infectious disease prevention and control? | □ | □ |
| 2 | Does the facility have designated staff responsible for infectious disease reporting? | □ | □ |

**Section 6: Implementation of Preventive Measures**

| No. | Item | Yes | No |
| --- | --- | --- | --- |
| 1 | Does the facility regularly ventilate rooms by opening windows? | □ | □ |
| 2 | Does the facility carry out disinfection as scheduled? | □ | □ |
| 3 | Does the facility have health monitoring measures such as temperature checks and morning inspections? | □ | □ |
| 4 | Does the facility provide guidance on medication for elderly residents (e.g., influenza antiviral prophylactic medication)? | □ | □ |
| 5 | Does the facility strictly enforce hand hygiene practices among caregivers? | □ | □ |

**Section 7: Health Promotion and Education**

| No. | Item | Yes (Frequency) | No |
| --- | --- | --- | --- |
| 1 | Does the facility distribute health education materials on influenza and other infectious diseases? | □ (_______ times/year) | □ |
| 2 | Does the facility have or post health education bulletin boards or posters on influenza and other infectious diseases? | □ (_______ times/year) | □ |
| 3 | Does the facility organize lectures on influenza and other infectious diseases? | □ (_______ times/year) | □ |
| 4 | Does the facility conduct health consultation activities on influenza and other infectious diseases? | □ (_______ times/year) | □ |
| 5 | Does the facility conduct drills on influenza cluster outbreak response? | □ (_______ times/year) | □ |
